# Supplementary material
Source: publisher figshare collection journal article supplement (https://sage.figshare.com/ndownloader/files/15619055)
Supplement: Supplementary file 1 [file 15619055]

Women publishing in APA journals: a gender analysis of six decades.

### Supplementary Material

#### Validation Study

To test the accuracy of our data, we followed a similar procedure to Larivière et al. (2013). These authors selected a random sample of authorships to manually check their gender identity. We randomly selected 384 authorships from the total of 154,988 authorships and manually identified the gender of each author by locating some biographical information or a photo on the Internet (see also González-Alvarez, 2017; González-Alvarez & Cervera-Crespo, 2017a, b). According to the formula:

$$\text{Sample size} = \frac{\frac{z^2 \times p(1-p)}{e^2}}{1 + \left(\frac{z^2 \times p(1-p)}{e^2 N}\right)}$$

where N = population size, e = margin of error, and z = z-score, 384 is the sample size corresponding to N= 154,988, e = 0.05, and a 95% confidence interval (online calculator at <https://www.surveymonkey.com/mp/sample-size-calculator/>).

After several attempts, the gender of 4 authorships could not be identified. The remaining 380 authorships corresponded to 246 men (64.7%) and 134 women (35.3%). The percent agreement was 96.3% for men and 95.5% for women. The gender proportions obtained were close to the overall rate of 63.8% men and 36.2% women

(see Results). The relative difference between the observed frequencies in the validation study (246 men, 134 women) and the expected frequencies according to the overall proportion (242.4 men, 137.6 women) was not significant,  $X^2(1) = 0.15$ ;  $p = 0.701$ .

Table S1. Number of articles published in the APA Journals during the years studied (PsyARTICLES, 2017). The journals are in alphabetical order.

| <b>APA Journals (articles)</b>                                           | <b>1963/67</b> | <b>1973/77</b> | <b>1983/87</b> | <b>1993/97</b> | <b>2003/07</b> | <b>2012/16</b> | <b>Total</b> |
|--------------------------------------------------------------------------|----------------|----------------|----------------|----------------|----------------|----------------|--------------|
| American Psychologist                                                    | 562            | 665            | 797            | 628            | 572            | 496            | <b>3,720</b> |
| Archives of Scientific Psychology                                        |                |                |                |                |                | 26             | <b>26</b>    |
| Behavior Analysis: Research and Practice                                 |                |                |                |                |                | 39             | <b>39</b>    |
| Behavioral Development Bulletin                                          |                |                |                |                | 19             | 91             | <b>110</b>   |
| Behavioral Neuroscience                                                  |                |                | 498            | 610            | 738            | 376            | <b>2,222</b> |
| Developmental Psychology                                                 |                | 677            | 568            | 473            | 465            | 931            | <b>3,114</b> |
| Emotion                                                                  |                |                |                |                | 251            | 576            | <b>827</b>   |
| Experimental and Clinical Psychopharmacology                             |                |                |                | 204            | 209            | 273            | <b>686</b>   |
| Health Psychology                                                        |                |                | 199            | 321            | 429            | 740            | <b>1,689</b> |
| History of Psychology                                                    |                |                |                |                | 97             | 144            | <b>241</b>   |
| Journal of Abnormal Psychology                                           | 211            | 468            | 291            | 377            | 369            | 480            | <b>2,196</b> |
| Journal of Applied Psychology                                            | 430            | 684            | 420            | 403            | 524            | 459            | <b>2,920</b> |
| Journal of Comparative and Physiological Psychology <sup>a</sup>         | 1,013          | 1,012          |                |                |                |                | <b>2,025</b> |
| Journal of Comparative Psychology                                        |                |                | 250            | 216            | 245            | 214            | <b>925</b>   |
| Journal of Consulting and Clinical Psychology <sup>b</sup>               |                | 894            | 713            | 654            | 564            | 522            | <b>3,347</b> |
| Journal of Consulting Psychology                                         | 618            |                |                |                |                |                | <b>618</b>   |
| Journal of Counseling Psychology                                         | 401            | 534            | 364            | 247            | 241            | 313            | <b>2,100</b> |
| Journal of Educational Psychology                                        | 258            | 562            | 369            | 278            | 311            | 388            | <b>2,166</b> |
| Journal of Experimental Psychology                                       | 1,227          | 724            |                |                |                |                | <b>1,951</b> |
| Journal of Exp. Psychology: Animal Behavior Processes                    |                | 92             | 179            | 164            | 188            | 77             | <b>700</b>   |
| Journal of Exp. Psychology: Animal Learning and Cognition                |                |                |                |                |                | 111            | <b>111</b>   |
| Journal of Experimental Psychology: Applied                              |                |                |                | 53             | 103            | 165            | <b>321</b>   |
| Journal of Experimental Psychology: General                              |                | 52             | 114            | 102            | 169            | 551            | <b>988</b>   |
| Journal of Exp. Psychology: Human Learning and Memory                    |                | 248            |                |                |                |                | <b>248</b>   |
| Journal of Exp. Psychology: Human Perception and Performance             |                | 162            | 275            | 432            | 455            | 768            | <b>2,092</b> |
| Journal of Exp. Psychology: Learning, Memory, and Cognition <sup>c</sup> |                |                | 295            | 470            | 490            | 699            | <b>1,954</b> |
| Journal of Family Psychology                                             |                |                | 13             | 178            | 340            | 508            | <b>1,039</b> |
| Journal of Personality and Social Psychology                             | 670            | 983            | 1,243          | 906            | 698            | 594            | <b>5,094</b> |
| Journal of Theoretical and Philosophical Psychology                      |                |                |                | 48             | 61             | 98             | <b>207</b>   |

|                                                             |              |              |              |              |               |               |               |
|-------------------------------------------------------------|--------------|--------------|--------------|--------------|---------------|---------------|---------------|
| Neuropsychology                                             |              |              | 12           | 287          | 363           | 423           | <b>1,085</b>  |
| Prevention & Treatment                                      |              |              |              | 1            | 6             |               | <b>6</b>      |
| Professional Psychology                                     |              | 390          |              |              |               |               | <b>390</b>    |
| Professional Psychology: Research and Practice <sup>d</sup> |              |              | 479          | 406          | 437           | 292           | <b>1,614</b>  |
| Psychological Assessment                                    |              |              |              | 301          | 244           | 668           | <b>1,213</b>  |
| Psychological Bulletin                                      | 307          | 342          | 294          | 229          | 176           | 210           | <b>1,558</b>  |
| Psychological Methods                                       |              |              |              | 54           | 133           | 165           | <b>352</b>    |
| Psychological Monographs: General and Applied               | 70           |              |              |              |               |               | <b>70</b>     |
| Psychological Review                                        | 191          | 125          | 105          | 157          | 174           | 161           | <b>913</b>    |
| Psychology and Aging                                        |              |              | 97           | 314          | 360           | 478           | <b>1,249</b>  |
| Psychology of Addictive Behaviors                           |              |              | 22           | 134          | 279           | 606           | <b>1,041</b>  |
| Psychology of Aesthetics, Creativity, and the Arts          |              |              |              |              | 37            | 223           | <b>260</b>    |
| Psychology, Public Policy, and Law                          |              |              |              | 72           | 84            | 171           | <b>327</b>    |
| Psychotherapy <sup>e</sup>                                  |              |              |              |              |               | 297           | <b>297</b>    |
| Psychotherapy: Theory, Research & Practice                  | 144          | 379          | 61           |              |               |               | <b>584</b>    |
| Psychotherapy: Theory, Research, Practice, Training         |              |              | 336          | 349          | 188           |               | <b>873</b>    |
| Rehabilitation Psychology                                   |              | 66           | 105          | 101          | 228           | 230           | <b>730</b>    |
| The Behavior Analyst Today                                  |              |              |              |              | 192           | 18            | <b>210</b>    |
| The Journal of Abnormal and Social Psychology               | 423          |              |              |              |               |               | <b>423</b>    |
| Theoretical & Philosophical Psychology                      |              |              | 37           |              |               |               | <b>37</b>     |
| Training and Education in Professional Psychology           |              |              |              |              | 41            | 176           | <b>217</b>    |
| <b>Total:</b>                                               | <b>6,525</b> | <b>9,059</b> | <b>8,136</b> | <b>9,169</b> | <b>10,480</b> | <b>13,757</b> | <b>57,126</b> |

<sup>a</sup> In 1982, the journal was split into *Behavioral Neuroscience* and *Journal of Comparative Psychology*, both included in the table.

<sup>b</sup> Before 1968, the name of the journal was *Journal of Consulting Psychology*, also included in the table.

<sup>c</sup> Before 1980, the name of the journal was *Journal of Experimental Psychology: Human Learning and Memory*, also included in the table.

<sup>d</sup> Before 1970, the name of the journal was *Professional Psychology*, also included in the table.

<sup>e</sup> *Psychotherapy* was previously called *Psychotherapy: Theory, Research & Practice*, and *Psychotherapy: Theory, Research, Practice, Training*, both included in the table.

Table S2. Gender distribution of Authorships and Authors (individuals) of articles published in the APA Journals during the years 1963-2016. Gender percentages refer to gender-identified values.

| Years | Articles | Authorships |                   |              |              | Authors |                   |              |              |
|-------|----------|-------------|-------------------|--------------|--------------|---------|-------------------|--------------|--------------|
|       |          | Total       | Gender Identified | Men. (%)     | Women (%)    | Total   | Gender Identified | Men (%)      | Women (%)    |
| 1963  | 1,099    | 1,859       | 1,662             | 1,429 (86.0) | 233 (14.0)   | 1,535   | 1,350             | 1,144 (84.7) | 206 (15.3)   |
| 1964  | 1,193    | 1,979       | 1,761             | 1,542 (87.6) | 219 (12.4)   | 1,634   | 1,435             | 1,237 (86.2) | 198 (13.8)   |
| 1965  | 1,334    | 2,190       | 1,998             | 1,769 (88.5) | 229 (11.5)   | 1,805   | 1,624             | 1,407 (86.6) | 217 (13.4)   |
| 1966  | 1,447    | 2,414       | 2,182             | 1,908 (87.4) | 274 (12.6)   | 1,956   | 1,740             | 1,501 (86.3) | 239 (13.7)   |
| 1967  | 1,452    | 2,438       | 2,231             | 1,927 (86.4) | 304 (13.6)   | 2,033   | 1,845             | 1,570 (85.1) | 275 (14.9)   |
| 1973  | 2,006    | 3,696       | 3,386             | 2,806 (82.9) | 580 (17.1)   | 3,169   | 2,877             | 2,350 (81.7) | 527 (18.3)   |
| 1974  | 2,044    | 3,773       | 3,464             | 2,857 (82.5) | 607 (17.5)   | 3,205   | 2,919             | 2,362 (80.9) | 557 (19.1)   |
| 1975  | 1,903    | 3,715       | 3,434             | 2,762 (80.4) | 672 (19.6)   | 3,175   | 2,911             | 2,298 (78.9) | 613 (21.1)   |
| 1976  | 1,611    | 3,146       | 2,917             | 2,252 (77.2) | 665 (22.8)   | 2,729   | 2,511             | 1,904 (75.8) | 607 (24.2)   |
| 1977  | 1,495    | 2,866       | 2,640             | 2,088 (79.1) | 552 (20.9)   | 2,536   | 2,318             | 1,807 (78.0) | 511 (22.0)   |
| 1983  | 1,504    | 3,222       | 3,001             | 2,194 (73.1) | 807 (26.9)   | 2,844   | 2,627             | 1,885 (71.8) | 742 (28.2)   |
| 1984  | 1,577    | 3,365       | 3,141             | 2,264 (72.1) | 877 (27.9)   | 2,957   | 2,739             | 1,937 (70.7) | 802 (29.3)   |
| 1985  | 1,664    | 3,625       | 3,422             | 2,408 (70.4) | 1,014 (29.6) | 3,196   | 2,997             | 2,058 (68.7) | 939 (31.3)   |
| 1986  | 1,677    | 3,742       | 3,523             | 2,459 (69.8) | 1,064 (30.2) | 3,240   | 3,030             | 2,069 (68.3) | 961 (31.7)   |
| 1987  | 1,714    | 3,800       | 3,546             | 2,441 (68.8) | 1,105 (31.2) | 3,303   | 3,059             | 2,055 (67.2) | 1,004 (32.8) |
| 1993  | 1,795    | 4,509       | 4,236             | 2,767 (65.3) | 1,469 (34.7) | 3,881   | 3,617             | 2,285 (63.2) | 1,332 (36.8) |
| 1994  | 1,759    | 4,542       | 4,266             | 2,738 (64.2) | 1,528 (35.8) | 3,915   | 3,650             | 2,257 (61.8) | 1,393 (38.2) |
| 1995  | 1,824    | 4,846       | 4,497             | 2,883 (64.1) | 1,614 (35.9) | 4,152   | 3,822             | 2,394 (62.6) | 1,428 (37.4) |
| 1996  | 1,923    | 5,152       | 4,787             | 3,030 (63.3) | 1,757 (36.7) | 4,426   | 4,078             | 2,503 (61.4) | 1,575 (38.6) |
| 1997  | 1,868    | 5,154       | 4,746             | 2,972 (62.6) | 1,774 (37.4) | 4,422   | 4,033             | 2,441 (60.5) | 1,592 (39.5) |
| 2003  | 1,943    | 5,975       | 5,503             | 3,291 (59.8) | 2,212 (40.2) | 5,141   | 4,689             | 2,726 (58.1) | 1,963 (41.9) |
| 2004  | 1,921    | 6,031       | 5,548             | 3,291 (59.3) | 2,257 (40.7) | 5,240   | 4,776             | 2,739 (57.3) | 2,037 (42.7) |
| 2005  | 2,095    | 6,583       | 6,053             | 3,641 (60.2) | 2,412 (39.8) | 5,646   | 5,129             | 2,963 (57.8) | 2,166 (42.2) |
| 2006  | 2,225    | 6,952       | 6,343             | 3,788 (59.7) | 2,555 (40.3) | 5,941   | 5,360             | 3,073 (57.3) | 2,287 (42.7) |

|               |               |                |                |                      |                      |                 |                |                      |                      |
|---------------|---------------|----------------|----------------|----------------------|----------------------|-----------------|----------------|----------------------|----------------------|
| <b>2007</b>   | 2,296         | 7,517          | 6,878          | 3,958 (57.5)         | 2,920 (42.5)         | 6,385           | 5,769          | 3,193 (55.3)         | 2,576 (44.7)         |
| <b>2012</b>   | 2,592         | 9,378          | 8,566          | 4,763 (55.6)         | 3,803 (44.4)         | 7,819           | 7,047          | 3,745 (53.1)         | 3,302 (46.9)         |
| <b>2013</b>   | 2,750         | 10,057         | 9,172          | 4,947 (53.9)         | 4,225 (46.1)         | 8,467           | 7,621          | 3,934 (51.6)         | 3,687 (48.4)         |
| <b>2014</b>   | 2,961         | 11,180         | 10,133         | 5,389 (53.2)         | 4,744 (46.8)         | 9,312           | 8,318          | 4,247 (51.1)         | 4,071 (48.9)         |
| <b>2015</b>   | 2,736         | 10,640         | 9,569          | 5,079 (53.1)         | 4,490 (46.9)         | 9,029           | 8,012          | 4,086 (51.0)         | 3,926 (49.0)         |
| <b>2016</b>   | 2,718         | 10,642         | 9,518          | 5,008 (52.6)         | 4,510 (47.4)         | 9,093           | 8,026          | 4,101 (51.1)         | 3,925 (48.9)         |
| <b>TOTAL:</b> | <b>57,126</b> | <b>154,988</b> | <b>142,123</b> | <b>90,651 (63.8)</b> | <b>51,472 (36.2)</b> | <b>132,186*</b> | <b>119,929</b> | <b>74,271 (61.9)</b> | <b>45,658 (38.1)</b> |

\*The Authors totals are different from those in Table 1 because in this table totals include duplicates between years.
